# Supplementary material for: Phosphate removal by ex situ generated Fe (hydr)oxides from scrap iron electrocoagulation: the critical role of coprecipitation
Source: Royal Society of Chemistry journal article supplement (doi:10.1039/d3va00024a), 2023-01-01
Supplement: d3va00024a1.pdf [file d3va00024a1.pdf]

## Supplementary Materials

### **Phosphate removal by ex-situ generated Fe (hydr)oxides from scrap iron electrocoagulation: the critical role of coprecipitation**

Shiwei Xie<sup>a,b</sup>, Zhengkang Bai<sup>a</sup>, Wei Shao<sup>a</sup>, Chen Wang<sup>a</sup>, Jianglong Qin<sup>a</sup>, Ze Liu<sup>a</sup>, Peng Liao<sup>c\*</sup>

<sup>a</sup> School of Urban Construction, Wuhan University of Science and Technology, Wuhan 430065, P. R. China

<sup>b</sup> Hubei Provincial Engineering Research Center of Urban Regeneration, Wuhan University of Science and Technology, Wuhan 430065, China

<sup>c</sup> State Key Laboratory of Environmental Geochemistry, Institute of Geochemistry, Chinese Academy of Sciences, Guiyang, 550081, PR China

\*Corresponding author, Email: liaopeng@mail.gyig.ac.cn.

Supplementary Materials include: Figs. S1–S5, and Tables S1–3.

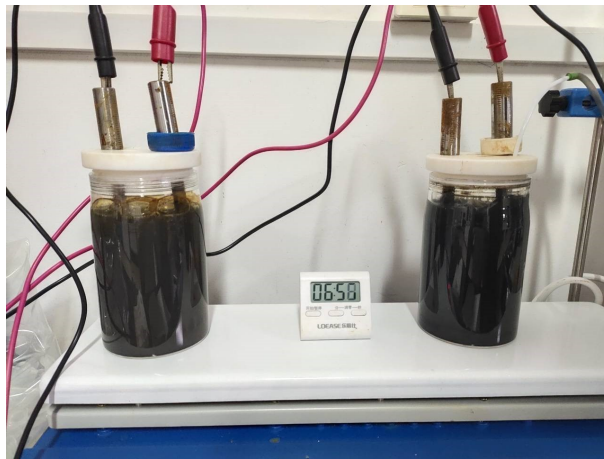

**Fig. S1.** Photo of the electrocoagulation experiment using scrap iron. The cylindrical cell is 128 mm of height and 78 mm of diameter.

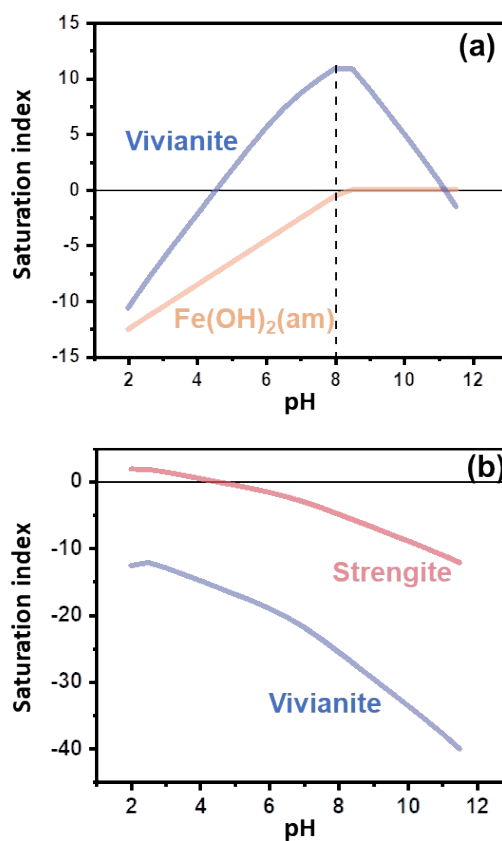

**Fig. S2.** Calculated saturation indexes of (a) vivianite and  $\text{Fe(OH)}_2(\text{am})$  in 0.2 M NaCl, 10 mg/L P as  $\text{PO}_4$ , and 3.1 mM  $\text{Fe(OH)}_2(\text{am})$  (represents the condition of 0 L/min), (b) vivianite and strengite in 0.2 M NaCl, 10 mg/L P as  $\text{PO}_4$ , and 1.0 mM magnetite and

2.1 mM lepidocrocite (represents the condition of 0.25–1.0 L/min) by Visual MINTEQ v3.1. Fe minerals of 3.1 mM were set since which was the amount of Fe dissolved from the anode after 25 min EC, and most of the Fe ions were precipitated before P removal. The thermodynamic parameters used in calculation were presented in Table S1.

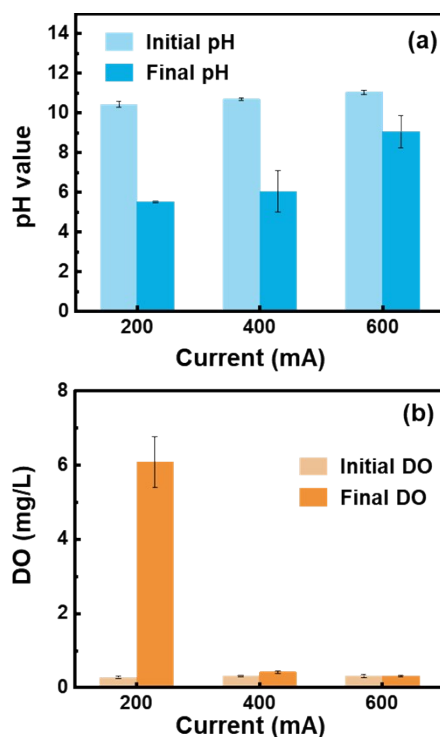

**Fig. S3** Change of (a) pH and (b) DO during the P removal processes by the Fe suspension generated from EC under different current intensities. Experiment conditions: [electrolyte]= 0.2 M NaCl, electrolysis for 25 min without aeration,  $[P]_0=10$  mg/L, P reaction time is 300 min.

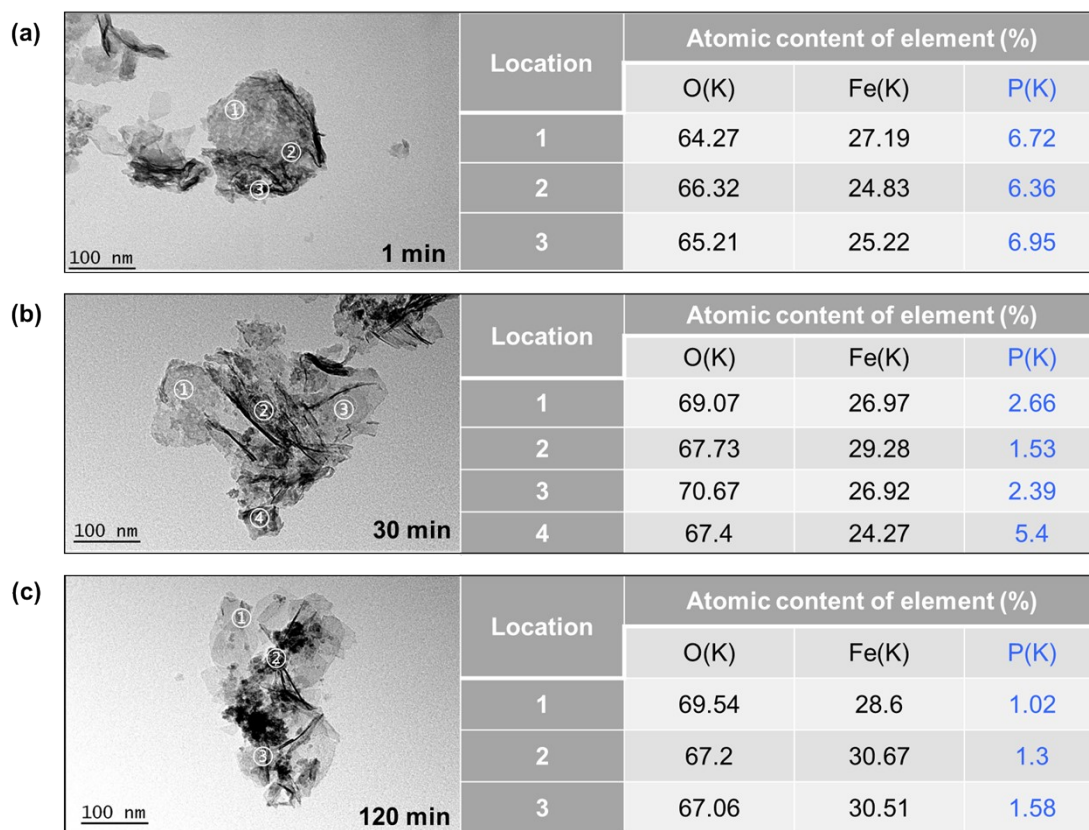

**Fig. S4** Bright field TEM images of the Fe-P solid samples obtained at (a) 1 min, (b) 30 min, and (c) 120 min. The element contents at different locations that identified by EDX were presented in the right.

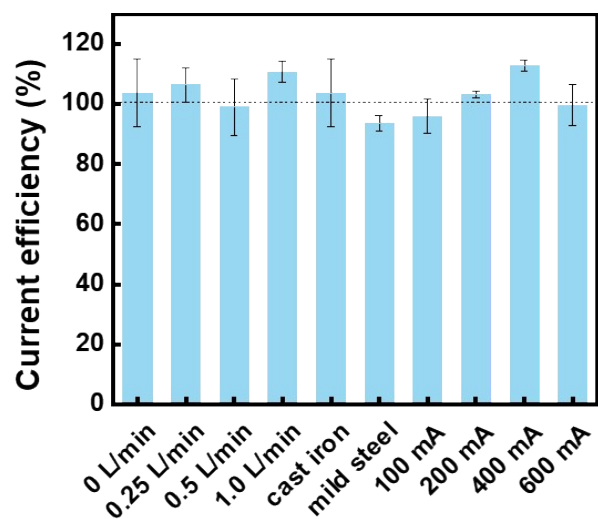

**Fig. S5** Current efficiency of the EC under variable conditions. Detailed experimental conditions were presented in Table S3.

Table S1 Thermodynamic parameters for species used in calculation in Fig. S2

| Species                                         | log K   | delta Hr (kJ/mol) |
|-------------------------------------------------|---------|-------------------|
| Fe(OH) <sub>2</sub> (aq)                        | -20.494 | 119.62            |
| Fe(OH) <sub>2</sub> <sup>+</sup>                | -5.75   | 37.7              |
| Fe(OH) <sub>3</sub> <sup>-</sup>                | -30.991 | 126.43            |
| Fe(OH) <sub>3</sub> (aq)                        | -15     | 75.3              |
| Fe(OH) <sub>4</sub> <sup>-</sup>                | -22.7   | 154.8             |
| Fe <sub>2</sub> (OH) <sub>2</sub> <sup>+4</sup> | -2.894  | 56.42             |
| Fe <sub>3</sub> (OH) <sub>4</sub> <sup>+5</sup> | -6.288  | 65.24             |
| FeCl <sup>+</sup>                               | -0.2    | 0                 |
| FeCl <sup>+2</sup>                              | 1.48    | 23                |
| FeH <sub>2</sub> PO <sub>4</sub> <sup>+</sup>   | 22.273  | 0                 |
| FeH <sub>2</sub> PO <sub>4</sub> <sup>+2</sup>  | 23.85   | 0                 |
| FeHPO <sub>4</sub> (aq)                         | 15.975  | 0                 |
| FeHPO <sub>4</sub> <sup>+</sup>                 | 22.285  | -30.5432          |
| FeOH <sup>+</sup>                               | -9.397  | 55.81             |
| FeOH <sup>+2</sup>                              | -2.02   | 25.1              |
| H <sub>2</sub> PO <sub>4</sub> <sup>-</sup>     | 19.573  | -18               |
| H <sub>3</sub> PO <sub>4</sub>                  | 21.721  | -10.5             |
| HPO <sub>4</sub> <sup>-2</sup>                  | 12.375  | -15               |
| Na <sub>2</sub> HPO <sub>4</sub> (aq)           | 13.32   | 0                 |
| Na <sub>2</sub> PO <sub>4</sub> <sup>-</sup>    | 2.59    | 0                 |
| NaCl (aq)                                       | -0.3    | -8                |
| NaH <sub>2</sub> PO <sub>4</sub> (aq)           | 19.873  | 0                 |
| NaHPO <sub>4</sub> <sup>-</sup>                 | 13.445  | 0                 |
| NaOH (aq)                                       | -13.897 | 59.81             |
| NaPO <sub>4</sub> <sup>-2</sup>                 | 1.43    | 8                 |
| OH <sup>-</sup>                                 | -13.997 | 55.81             |
| Fe(OH) <sub>2</sub> (am)                        | 13.49   | -91.62            |
| vivianite                                       | -37.76  | 5.06              |
| Magnetite                                       | 3.4028  | -208.5259         |
| Lepidocrocite                                   | 1.371   | 0                 |

Table S2 Fe( $2p_{3/2}$ ) peak fitting data for spectra shown in Fig. 7d–f.

| Sample  | Binding Energy | FWHM | %Area | Species                |
|---------|----------------|------|-------|------------------------|
| 1 min   | 710            | 1.1  | 22    | Fe(II)-PO <sub>4</sub> |
|         | 711            | 1.1  | 24    | Fe(II)-PO <sub>4</sub> |
|         |                | sum  | 46    |                        |
|         | 711.6          | 1.55 | 27    | Fe(III)-OH             |
|         | 712.7          | 1.55 | 20    | Fe(III)-OH             |
|         | 713.8          | 1.55 | 7     | Fe(III)-OH             |
|         | 715.1          | 1.55 | 0     | Fe(III)-OH             |
|         |                | sum  | 54    |                        |
| 30 min  | 710            | 1.1  | 16    | Fe(II)-PO <sub>4</sub> |
|         | 711            | 1.1  | 24    | Fe(II)-PO <sub>4</sub> |
|         |                | sum  | 40    |                        |
|         | 711.6          | 1.54 | 30    | Fe(III)-OH             |
|         | 712.7          | 1.54 | 22    | Fe(III)-OH             |
|         | 713.8          | 1.54 | 8     | Fe(III)-OH             |
|         | 715.1          | 1.54 | 0     | Fe(III)-OH             |
|         |                | sum  | 60    |                        |
| 120 min | 710            | 1.1  | 16    | Fe(II)-PO <sub>4</sub> |
|         | 711            | 1.1  | 24    | Fe(II)-PO <sub>4</sub> |
|         |                | sum  | 40    |                        |
|         | 711.6          | 1.56 | 28    | Fe(III)-OH             |
|         | 712.7          | 1.56 | 23    | Fe(III)-OH             |
|         | 713.8          | 1.56 | 9     | Fe(III)-OH             |
|         | 715.1          | 1.56 | 0     | Fe(III)-OH             |
|         |                | sum  | 60    |                        |

Table S3 Experimental conditions of every single pillar in Fig. S5.

| Variations | Conditions                                                                      | Average CE | Error |
|------------|---------------------------------------------------------------------------------|------------|-------|
| 0 L/min    | 0.2 M NaCl, cast iron electrode, 200 mA, 10 mg/L PO <sub>4</sub> <sup>3-</sup>  | 103.6      | 11.3  |
| 0.25 L/min | 0.2 M NaCl, cast iron electrode, 200 mA, 10 mg/L PO <sub>4</sub> <sup>3-</sup>  | 106.4      | 5.8   |
| 0.5 L/min  | 0.2 M NaCl, cast iron electrode, 200 mA, 10 mg/L PO <sub>4</sub> <sup>3-</sup>  | 99.0       | 9.5   |
| 1.0 L/min  | 0.2 M NaCl, cast iron electrode, 200 mA, 10 mg/L PO <sub>4</sub> <sup>3-</sup>  | 110.7      | 3.5   |
| cast iron  | 0.2 M NaCl, 0 L/min, 200 mA, 10 mg/L PO <sub>4</sub> <sup>3-</sup>              | 103.6      | 11.3  |
| mild steel | 0.2 M NaCl, 0 L/min, 200 mA, 10 mg/L PO <sub>4</sub> <sup>3-</sup>              | 93.6       | 2.5   |
| 100 mA     | 0.2 M NaCl, 0 L/min, cast iron electrode, 10 mg/L PO <sub>4</sub> <sup>3-</sup> | 96.0       | 5.8   |
| 200 mA     | 0.2 M NaCl, 0 L/min, cast iron electrode, 10 mg/L PO <sub>4</sub> <sup>3-</sup> | 103.1      | 1.1   |
| 400 mA     | 0.2 M NaCl, 0 L/min, cast iron electrode, 10 mg/L PO <sub>4</sub> <sup>3-</sup> | 112.7      | 1.9   |
| 600 mA     | 0.2 M NaCl, 0 L/min, cast iron electrode, 10 mg/L PO <sub>4</sub> <sup>3-</sup> | 99.5       | 6.9   |
